## ARP2/3- and resection-coupled genome reorganization facilitates translocations

Jennifer Zigelbaum<sup>1,2</sup>, Allana Schooley<sup>3^</sup>, Junfei Zhao<sup>4^</sup>, Benjamin R. Schrank<sup>1#</sup>, Elsa Callen<sup>5</sup>, Shan Zha<sup>1,6</sup>, Max E. Gottesman<sup>7</sup>, André Nussenzweig<sup>5</sup>, Raul Rabadan<sup>4</sup>, Job Dekker<sup>3</sup>, and Jean Gautier<sup>1,8\*</sup>

<sup>1</sup>Institute for Cancer Genetics, Columbia University Vagelos College of Physicians and Surgeons, New York, New York, USA

<sup>2</sup>Integrated Program in Cellular, Molecular, and Biomedical Studies, Columbia University Vagelos College of Physicians and Surgeons, New York, New York, USA

<sup>3</sup>Department of Biochemistry and Biomedical Pharmacology, University of Massachusetts Medical School, Worcester, Massachusetts, USA

<sup>4</sup>Department of Systems Biology, Columbia University Vagelos College of Physicians and Surgeons, New York, New York, USA

<sup>5</sup>Laboratory of Genome Integrity, National Institutes of Health, Bethesda, Maryland, USA

<sup>6</sup>Department of Pathology and Cell Biology and Department of Pediatrics, Columbia University Vagelos College of Physicians and Surgeons, New York, New York, USA

<sup>7</sup>Department of Biochemistry and Biophysics, Columbia University Vagelos College of Physicians and Surgeons, New York, New York, USA

<sup>8</sup>Department of Genetics and Development, Columbia University Vagelos College of Physicians and Surgeons, New York, New York, USA

#Current address: The University of Texas MD Anderson Cancer Center, Houston, Texas 77030

^These authors contributed equally to this work

\*Corresponding author

E-mail: [jg130@cumc.columbia.edu](mailto:jg130@cumc.columbia.edu)

## 1 **Summary**

2 DNA end-resection and nuclear actin-based movements orchestrate clustering of double-strand  
3 breaks (DSBs) into homology-directed repair (HDR) domains. Here, we analyze how actin nucleation by  
4 ARP2/3 affects damage-dependent and -independent 3D genome reorganization and facilitates  
5 pathologic repair. We observe that DNA damage, followed by ARP2/3-dependent establishment of repair  
6 domains enhances local chromatin insulation at a set of damage-proximal boundaries and affects  
7 compartment organization genome-wide. Nuclear actin polymerization also promotes interactions  
8 between DSBs, which in turn facilitates aberrant intra- and inter-chromosomal rearrangements. Notably,  
9 BRCA1 deficiency, which decreases end-resection, DSB mobility, and subsequent HDR, nearly abrogates  
10 recurrent translocations between AsiSI DSBs. In contrast, loss of functional BRCA1 yields unique  
11 translocations genome-wide, reflecting a critical role in preventing spontaneous genome instability and  
12 subsequent rearrangements. Our work establishes that the assembly of DSB repair domains is coordinated  
13 with multiscale alterations in genome architecture that enable HDR despite increased risk of  
14 translocations with pathologic potential.

15

## 16 **Main**

17 Eukaryotic nuclei are organized into functional domains enriched in proteins and factors involved  
18 in nuclear transactions including RNA splicing, transcription, DNA replication, and repair<sup>1</sup>. Repair domains  
19 assemble in biomolecular condensates mediated by mechanical forces and multivalent interactions  
20 between proteins and nucleic acids<sup>1</sup>. We have shown that the actin nucleator, ARP2/3, and its activator  
21 WASP promote clustering of DSBs into homology-directed repair (HDR) domains, which stimulates repair  
22 by facilitating DNA end-resection<sup>2</sup>, the initial step of HDR<sup>3</sup>. In turn, resection leads to increased DSB  
23 mobility<sup>2</sup>. Thus, HDR domains arise from the coordinated action of actin forces and repair reactions.

24 Besides facilitating repair<sup>2,4-8</sup>, the impact of ARP2/3 and DSB-induced motion on genome  
25 organization is poorly understood. Moreover, the pathologic consequences of assembling DSBs into  
26 nuclear domains are not fully known. Imaging of DSBs in mammalian cells has revealed that translocating  
27 breaks are mobile<sup>9</sup>, and clustering of DSBs in yeast promotes rearrangements<sup>6,10</sup>. Furthermore, CtIP-  
28 dependent resection facilitates translocations in mouse cells<sup>11</sup>, highlighting that DSB end-processing can  
29 lead to misrepair. Nevertheless, it remains unclear how proteins that mediate HDR domain formation,  
30 including actin nucleators and resection machinery such as the tumor suppressor BRCA1, affect  
31 chromosome translocations.

32

## 1 **DNA damage induces local and global chromatin reorganization**

2 DNA damage activates the local, stepwise recruitment of repair proteins to damage sites as well  
3 as protein modifications that can spread over megabases along chromatinized DNA, such as the  
4 phosphorylation of the histone H2A variant, H2AX<sup>12-14</sup>. Live-cell imaging and clustering analyses of DNA  
5 repair foci demonstrate that these processes translate into the 3D reorganization of chromatin<sup>2,15</sup> but do  
6 not fully characterize the genomic features of repair domains and the rules that govern their assembly.  
7 To assess the impact of DSBs on genome organization, we performed chromosome conformation capture  
8 (Hi-C) in mouse embryonic fibroblasts (MEFs)<sup>16</sup> and human osteosarcoma cells (U2OS)<sup>17</sup> harboring an  
9 inducible AsiSI restriction endonuclease. These cells express AsiSI fused to a truncated estrogen receptor  
10 that translocates to the nucleus upon induction with 4-hydroxy-tamoxifen (4OHT). There are over one  
11 thousand AsiSI recognition motifs in the mouse genome. However, cleavage efficiency, as measured by  
12 END-seq spike-in assays, revealed that a significant proportion of these sites are not cut in MEFs (**Extended**  
13 **Data Fig. 1a**). Therefore, for quantitative analysis of Hi-C data, we focused on a subset of 97 frequently  
14 cut AsiSI sites which showed the highest END-seq signal above background and collectively account for  
15 the approximately 100 DSBs per cell<sup>16</sup>. Cells were treated with the ARP2/3 inhibitor, CK-666, for six hours  
16 following induction of DSBs (+4OHT). After ensuring that CK-666 did not affect cutting efficiency of AsiSI-  
17 ER or the accumulation of damage (**Extended Data Fig. 1b,c**), two biological replicates were performed.  
18 Replicates of Hi-C experiments showed comparable phenotypes (**Extended Data Fig. 1d**), and data was  
19 pooled for the main figure sets.

20 Hi-C studies have revealed that the genome can be split into A (open) and B (closed) chromatin  
21 compartments that preferentially self-interact and represent open and closed chromatin, respectively<sup>18</sup>.  
22 We first sought to examine the impact of DSBs and nuclear actin polymerization on A/B compartment  
23 distribution using eigenvalue (principal component, PC1) decomposition of contact matrices<sup>18,19</sup>.  
24 Strikingly, eigenvector analysis of intra-chromosomal interactions revealed that following induction of  
25 damage, a significant fraction of 250 kb bins, particularly those with eigenvalues closer to zero, had a  
26 relative increase in EV1 and apparent flip from B (closed chromatin) to A (open chromatin) (**Fig. 1a**;  
27 **Extended Data Fig. 2a,b**). Approximately 15% (all sites) or 25% (top 97 sites) of B chromatin bins flipped  
28 to the A compartment genome-wide or within 2 Mb of frequently digested AsiSI sites, respectively (**Fig.**  
29 **1a**). These changes resulted in genome-wide enrichment of open chromatin with a nearly 10 percent  
30 increase in the A compartment following damage (**Extended Data Fig. 2a**). An example of a B-to-A  
31 compartment flip (blue to red) coinciding with an AsiSI site on chromosome 2 is shown (**Fig. 1b**, DSB #50).  
32 Switches were also found at a distance from the AsiSI site, as seen 2 Mb downstream of DSB #8 (**Fig. 1b**).

1 Notably, ARP2/3 inhibition with CK-666, dampened damage-induced compartment flips, indicating a role  
2 for nuclear actin polymerization in genome compartmentalization (**Fig. 1a; Extended Data Fig. 2a,b**).  
3 Compartment flips during transcriptional regulation correlate with changes in histone modifications<sup>20</sup>.  
4 Similarly, restriction endonuclease damage induces megabase-sized chromatin remodeling events,  
5 including H2AX phosphorylation, ubiquitin accumulation, and histone H1 depletion<sup>14</sup>, which may  
6 contribute to the compartment switching events seen here. We next visualized genome-wide  
7 compartmentalization using saddle plots, which display interaction frequencies between pairs of 250 kb  
8 loci arranged according to their first eigen values (**Extended Data Fig. 2c**). Compartment strength was  
9 calculated using  $(AA+BB)/(AB+BA)$  to assess the preference for homotypic (A-A, B-B) over heterotypic (A-  
10 B) interactions<sup>21</sup>. Saddle plots and strength quantification revealed that damage increased both  
11 homotypic interactions and compartment strength in the B compartment (**Extended Data Fig. 2c**).  
12 Notably, ARP2/3 inhibition with CK-666 slightly increased B-B interaction strength in both the presence  
13 and absence of damage, further suggesting a role for actin nucleation in compartmentalization (**Extended**  
14 **Data Fig. 2c**).

15 Contact probability  $P$  plotted as a function of genomic distance  $s$  ( $P(s)$ ) can reveal properties of  
16 chromatin architecture including the size and density of cohesin-dependent loops<sup>22</sup> (**Extended Data Fig.**  
17 **2d**). The derivative of  $P(s)$  typically displays a local peak at  $s \sim 100$  kb, corresponding to the average size of  
18 loops, followed by a valley at  $s \sim 2$  Mb. The depth of the valley is related to loop density<sup>22</sup>. Analysis of the  
19 derivative of  $P(s)$  for Hi-C data obtained from cells with induced DNA damage revealed a more pronounced  
20 valley at  $s \sim 2$  Mb (**Extended Data Fig. 2d**). This can be interpreted as a general increase in loop density.  
21 An increased number of loops/kb of DNA upon damage is consistent with previous observations of  
22 increased cohesin recruitment to DSBs, including those induced by restriction endonucleases, that could  
23 reflect cohesin-driven loop extrusion at DSBs<sup>23-25</sup>, or possibly more generally genome-wide. Indeed,  
24 average Hi-C interaction frequency aggregated at CTCF sites showed increased line formation (**Extended**  
25 **Data Fig. 2e**). Such lines reflect increased cohesin-mediated loop formation where one base of the loop is  
26 anchored at the CTCF sites. Hi-C interaction frequency between pairs of convergent CTCF-CTCF sites also  
27 increased upon DNA damage (**Extended Data Fig. 2f**). Interestingly, the difference in  $P(s)$  upon DNA  
28 damage, as well as average insulation and loop strength at and between CTCF sites was not diminished in  
29 the presence of CK-666 (data not shown).

30 Next, we aggregated contact matrices spanning 2 Mb around frequently cut AsiSI sites to visualize  
31 interactions in the absence (No Damage, N.D.) and presence (+4OHT) of DSBs (**Fig. 1c**). Average contact  
32 maps revealed a striking level of organization in undamaged cells, as seen by strong insulation at the AsiSI

1 motifs (**Fig. 1c, left panel**). Importantly, gene set-enrichment analysis (GSEA), which identifies statistically  
2 significant relationships between biological states, showed that frequently cut AsiSI sites are enriched in  
3 transcriptionally active areas (**Extended Data Fig. 2g**). Upon induction of DSBs, average insulation at these  
4 sites increased in both MEFs (**Fig. 1c, middle and right panels**) and in AsiSI-U2OS cells (**Extended Data Fig.**  
5 **2h**) indicating that this is a conserved feature. This increase is likely driven by a subset of DSBs located at  
6 insulated boundaries, or compartment boundaries. This suggests that DNA damage strengthens pre-  
7 existing genome organization into more robust DNA repair domains<sup>15,25,26</sup>.

8         These data reveal multiscale changes in the 3D genomic landscape following damage, including  
9 compartment switching that favors open chromatin states, increased loop density, and reinforcement of  
10 pre-existing chromatin organization surrounding DSBs. It also suggests that long-range genome  
11 reorganization, such as damage-induced compartment flipping that enriches for A compartment, is  
12 regulated in part by ARP2/3-driven nuclear actin polymerization.

13

#### 14 ***Chromosome translocations occur at sites of DSB clustering***

15         In yeast and mammalian cells, DSB mobility drives clustering of DSBs into repair factories<sup>2,4-8</sup>.  
16 Therefore, we sought to characterize long-range intrachromosomal interactions using aggregate peak  
17 analysis (APA)<sup>27,28</sup>. We piled-up all possible pairwise interactions (304) occurring within chromosomes (in  
18 *cis*) between the most frequently cut AsiSI sites. Following damage, we visualized distant DSBs coming  
19 together in both MEF and U2OS cells (**Fig. 2a, Extended Data Fig. 3a-d**). DSB cluster enrichment scores  
20 were calculated by comparing the average signal intensity at the center of the plot with that of the  
21 surrounding area, allowing for relative quantification of interaction frequency between AsiSI sites.  
22 Clustering increased upon addition of 4OHT (1.24 to 2.01), indicating that DNA damage triggered  
23 increased interactions between distant DSBs within individual chromosomes (**Fig 2a; Extended Data Fig.**  
24 **3c**). These distant DSB-DSB interactions were partially reduced by CK-666 treatment (2.01 to 1.80). These  
25 data suggest that this DNA damage-dependent clustering is driven in part by ARP2/3-dependent nuclear  
26 actin polymerization.

27         Next, we sought to visualize clustering of individual DSBs within a single chromosome (Chr 2).  
28 We analyzed Hi-C interactions (normalized to observed/expected) between the area surrounding a  
29 frequently cleaved DSB on chromosome 2 and 1 Mb bins spanning the rest of chromosome 2. For  
30 differential interaction plots, blue bars above the axis indicate strengthened interactions following  
31 damage, while red bars below the axis represent a decrease in interaction frequency (**Fig. 2b**).  
32 Concordant with APA analysis (**Fig. 2a**), we found that following damage this reference site (gray)

1 interacted with other DSBs in *cis* (arrows) with frequencies significantly higher than in the absence of  
2 damage (**Fig. 2b, top**). Next, we assessed the impact of DSB clustering in *cis* (**Fig. 2b**) on intrachromosomal  
3 translocations. Indeed, a significant fraction of oncogenic translocations takes place between loci on the  
4 same chromosome<sup>29-31</sup>. Thus, we performed high-throughput genome-wide translocation sequencing  
5 (HTGTS) to test whether genomic reorganization following damage influences chromosome  
6 rearrangements. HTGTS identifies translocation events between a fixed “bait” DSB and “prey” sites  
7 throughout the genome (**Extended Data Fig. 4a**)<sup>32</sup>. To explore how damage-induced chromatin  
8 reorganization influences aberrant rearrangements, we used the same AsiSI reference site on  
9 chromosome 2 as the bait site. HTGTS analyses revealed that the loci of heightened interactions  
10 corresponded to sites of frequent translocations with the bait (**Fig. 2b, bottom**).

11 We then assessed the correlation between contact frequency (+4OHT) and translocation  
12 frequency across chromosome 2. We observed that chromatin contact frequency predicted translocation  
13 occurrence with a significant Pearson correlation coefficient,  $r$ , of 0.6490 (**Fig. 2c**). Thus, DNA repair  
14 domains are sites where translocations can occur.

15

### 16 ***ARP2/3-mediated DSB clustering facilitates genomic rearrangements***

17 Given that approximately 100 AsiSI sites are efficiently cut upon induction of AsiSI-ER, we  
18 predicted that most recurrent translocations would take place between active AsiSI loci. Indeed, more  
19 than 80% of prey originated from within 500 bp of an AsiSI site (**Fig. 3a**), whereas approximately 15% of  
20 translocations occurred 10 kb - 100 Mb away from an AsiSI motif. The distribution of prey sites in U2OS  
21 cells revealed similar classes (proximal, distal) of translocations (**Extended Data Fig. 4b**). Translocations  
22 between AsiSI-proximal sites and the bait are recurrent, with variable levels of end-resection, mostly  
23 under 500 bp. Recurrent translocations are not identical at the nucleotide level as PCR duplicates are  
24 filtered by the HTGTS pipeline. Translocations to distal prey are primarily unique translocations  
25 (**Extended Data Fig. 4c**) and might involve spontaneous, physiological DSBs forming at sites of intrinsic  
26 genome fragility, including R-loops, G4 quadruplex, stalled replication forks, and active transcription<sup>33</sup>.  
27 We showed that frequently cleaved AsiSI sites are within transcriptionally active regions (**Extended Data**  
28 **Fig. 2g**). Similarly, translocations originating from loci proximal to AsiSI sites were highly enriched in  
29 promoter sequences (**Extended Data Fig. 4d**) and located in transcriptionally active areas, as seen by  
30 GSEA (**Extended Data Fig. 4e**). In contrast, translocations originating from regions distal to AsiSI sites  
31 occurred throughout the genome (**Extended Data Fig. 4d**).

1           ARP2/3 facilitates distant DSB-DSB interactions (**Fig. 2a**) and promotes clustering of repair foci<sup>2</sup>.  
2           However, it is not known whether nuclear actin dynamics impact the frequency of chromosome  
3           translocations. To establish formally that increased interactions between DSBs drives chromosome  
4           rearrangements, we assessed the impact of ARP2/3 inhibition on translocations genome-wide, using  
5           HTGTS. Translocations were monitored six hours after DSB induction in control cells and in cells treated  
6           with CK-666. CK-666 significantly decreased the normalized frequency (see methods) of both intra-  
7           chromosomal (chromosome 2),  $p < 0.01$  for the three binned loci (**Fig. 3b**) and inter-chromosomal  
8           translocations,  $p = 3.6 \cdot 10^{-16}$  (**Fig. 3c**). Furthermore, the fold decrease (CK-666/DMSO) in normalized, AsiSI-  
9           proximal translocation frequency was comparable for intra- and inter-chromosomal translocations  
10          (**Extended Data Fig. 4f**). This establishes that ARP2/3-dependent actin nucleation is a driving force for  
11          chromosome rearrangements.

12          We then asked how DSB mobility affected translocations to spontaneous DSBs. The frequency of  
13          translocations to distal DSBs was significantly decreased following treatment with ARP2/3 inhibitor,  
14          albeit to a lesser extent than the frequency of translocations to proximal DSBs (**Fig. 3d**). Thus, a smaller  
15          fraction of physiologic translocations is driven by nuclear actin polymerization. The propensity to  
16          translocate in the presence of CK-666 could reflect intrinsic properties of the prey loci, including their  
17          transcriptional activity. Therefore, we examined the impact of ARP2/3 inhibition on translocations  
18          originating from DSBs in promoter, gene body, and intergenic regions (**Fig. 3e**). ARP2/3 inhibition  
19          significantly reduced the frequency of translocations arising from spontaneous DSBs in promoter regions,  
20          a decrease that mirrored the effect of CK-666 on recurrent, experimentally-induced (AsiSI-AsiSI)  
21          rearrangements (compare **Fig. 3d** and **Fig. 3e**). ARP2/3 inhibition also modestly decreased translocations  
22          initiating from spontaneous DSBs in gene bodies. In contrast, ARP2/3 inhibition did not have a statistically  
23          significant impact on translocations arising from intergenic loci.

24          DNA sequences at translocation junctions provide further insight into the repair mechanisms  
25          driving rearrangements<sup>34,35</sup>. Specifically, the presence of limited microhomology (MH) suggests repair by  
26          alternative end-joining (alt-EJ) whereas blunt-end ligation indicates repair by classical NHEJ (c-NHEJ)<sup>36</sup>.  
27          We found that only 18% of junctions resulted from blunt-end ligation (**Extended Data Fig. 5a**). In contrast,  
28          69% of junctions harbored microhomologies (MH), emphasizing the importance of alt-EJ in mediating  
29          pathologic repair (**Extended Data Fig. 5a**). Unexpectedly, we observed that 13% of translocations  
30          contained additional short insertions. These complex rearrangements did not arise from direct ligation  
31          of blunt ends or from annealing of staggered DNA ends between the bait and prey chromosomes  
32          (**Extended Data Fig. 5a**). Of note, larger inserts (> 30 bp) were not detected due to the limits of HTGTS

1 analysis, suggesting that insertions are more frequent than we report. To explore the origins of insertion  
2 events, we mapped inserts (20 bp – 30 bp) for all proximal reads. The majority of inserts (> 80%) mapped  
3 to the vicinity of prey loci, often on the antiparallel strand (**Extended Data Fig. 5b,c**). This suggests that  
4 an intermediate step, possibly a transient invasion or annealing event, took place prior to the ligation  
5 that gave rise to a stable translocation.

6

### 7 ***Distinct roles for BRCA1 in regulating translocations***

8 ARP2/3 clusters spontaneous and endonuclease-generated DSBs into HDR domains, where  
9 translocations occur. Inhibition of Mre11-dependent resection, the initial step of HDR, impairs DSB  
10 mobility and ARP2/3-mediated clustering<sup>2,15,37</sup>, highlighting a role for resection in the formation of repair  
11 domains. In addition to promoting end-resection at HDR breaks, BRCA1 safe-guards against chromosome  
12 translocations, as evidenced by the accumulation of genomic rearrangements in BRCA1-deficient  
13 tumors<sup>38-40</sup>. Therefore, we sought to examine the impact of BRCA1 loss on chromosome mobility and  
14 translocations. We used BRCA1<sup>Δ11</sup> AsiSI MEF cells with a truncated BRCA1 that lacks exon 11, impairing  
15 DSB resection<sup>16,41</sup>. We first confirmed that cleavage at the chromosome 2 bait site was comparable in WT  
16 and BRCA1<sup>Δ11</sup> cells (**Extended Data Fig. 6a**), then performed HTGTS in BRCA1-deficient MEFs. The  
17 frequency of recurrent translocations, both intra-chromosomal (chromosome 2),  $p < 0.001$  (**Fig. 4a**) and  
18 inter-chromosomal,  $p = 9.58 \times 10^{-24}$  (**Fig. 4b**) between AsiSI-AsiSI DSBs was markedly decreased in  
19 BRCA1<sup>Δ11</sup> MEFs. This finding is consistent with the role of BRCA1 in promoting end-resection, which occurs  
20 upstream of ARP2/3 activity. Indeed, inhibition of ARP2/3 in BRCA1-deficient cells did not further reduce  
21 translocation frequency (**Fig. 4a**). We next evaluated the link between DSB resection and mobility by  
22 performing live-cell imaging of BRCA1<sup>Δ11</sup> MEFs. We found that mean square displacement (MSD) of NBS1  
23 repair foci, which is recruited prior to resection of DSBs, was substantially lower in BRCA1-deficient cells  
24 as compared to WT (**Fig. 4c**). These findings further strengthen the idea that recurrent translocations are  
25 facilitated within HDR domains, the site of BRCA1 action.

26 Whole genome sequencing of tumors harboring BRCA1 mutations has revealed rearrangement  
27 signatures thought to be the consequence of BRCA1's role in suppressing endogenous genome  
28 instability<sup>38,40</sup>. Therefore, we next examined how BRCA1-deficiency might specifically affect spontaneous  
29 translocations by analyzing the distribution of prey as a function of distance to the nearest AsiSI site (**Fig.**  
30 **4d**). Strikingly, translocations in BRCA1<sup>Δ11</sup> cells occurred more frequently between the bait and distal  
31 DSBs than in WT cells +/- CK-666 (**Fig. 4d,e; Extended Data Fig. 6b-d**), indicating a distinct role of BRCA1  
32 in preventing translocations. Furthermore, analysis of the cumulative frequency of prey distribution in



1 WT and BRCA1<sup>Δ11</sup> cells as a function of the distance to AsiSI sites revealed significantly different  
2 distributions (**Extended Data Fig. 6b**). This increase in translocations to distant loci could manifest from  
3 replication fork collapse or transcription-related stress as both processes are resolved by intact BRCA1<sup>42,43</sup>  
4 (**Extended Data Fig. 6e**).

5

## 6 **Conclusions**

7 DNA damage triggers local signaling to facilitate repair reactions at DNA lesions<sup>44</sup>, subsequent  
8 checkpoint activation yielding long-range histone and post-translational modifications<sup>45</sup>, and ARP2/3-  
9 mediated DSB mobility<sup>2,4</sup>. Together, these events promote the formation of HDR domains. Our studies  
10 provide insights into the coordinated, multiscale reorganization of the 3D genome leading to the  
11 formation of these domains. First, we observe local strengthening of insulation boundaries at DSBs<sup>25,26</sup>  
12 (**Fig. 1c; Extended Data Fig. 7, 1**) and increased chromatin loop extrusion at CTCF boundaries<sup>46-48</sup>  
13 (**Extended Data Fig. 2d-f**), both possibly the result of increased cohesin loading. Second, we provide a  
14 genomic view of DSB clustering (**Fig. 2a; Extended Data Fig. 7, 2**). Finally, we document DNA damage-  
15 dependent, genome-wide changes in compartmentalization that can be quantified as B to A compartment  
16 flips (**Fig 1a, b, Extended Data Fig. 7, 3**). Notably, damage-induced, long-range reorganization, such as  
17 clustering of DSBs and compartment flips, is facilitated in part by ARP2/3-dependent forces, whereas local  
18 changes in insulation and loop extrusion are not. These data are consistent with a model in which  
19 chromatin accessibility following damage is favored within A compartments. In turn, this facilitates DSB  
20 clustering and the generation of HDR domains, while repair activity surrounding individual DSBs is  
21 restricted by enhanced insulation.

22 Using high throughput translocation assays (HTGTS), we show that ARP2/3- and resection-  
23 mediated formation of HDR domains increases the risk of chromosomal translocations while facilitating  
24 homologous recombination<sup>2</sup>. The increased contact frequency revealed by Hi-C is not just due to  
25 rearrangements as translocation events are much more rare. We confirm that HTGTS is a powerful  
26 method for identifying translocations to naturally unstable loci, establishing that ARP2/3's impact on  
27 chromosomal rearrangements is not limited to restriction endonuclease-generated DSBs but is also  
28 relevant for physiological damage. Nevertheless, the partial impact of ARP2/3 inhibition points to  
29 additional mechanisms for DSB clustering and pathogenic translocations, which may include different  
30 actin nucleators<sup>15,49</sup>, alternate cytoskeleton proteins<sup>4,50</sup>, and phase-separated boundaries<sup>51,52</sup>.

31 Chromosome translocations require an end-joining step<sup>53</sup> (data not shown). Here we establish  
32 that clustering of resected DNA ends arising from transcriptionally active loci is also critical for

1 translocations. We thus propose that translocations are generated by a two-step process. First, actin  
2 nucleators (ARP2/3) and resection machinery (BRCA1) bring recurrent and spontaneous DSBs harboring  
3 resected ends into close proximity (**Extended Data Fig. 7, 2**). Second, resected DNA ends are processed to  
4 be compatible with end-joining reactions or alternatively, transiently invade the prey locus capturing  
5 additional sequences prior to end-joining. This is consistent with frequent insertion events observed  
6 previously at translocation junctions<sup>54,55</sup> as well as in this study (**Extended Data Fig. 5b**). Finally, we  
7 establish that while BRCA1-dependent resection facilitates DSB mobility, increasing translocations  
8 between recurrent DSBs, the tumor suppressor maintains genome integrity during DNA transactions,  
9 preventing spontaneous translocations to fragile genomic regions (**Extended Data Fig. 7**). Overall, our  
10 work highlights the delicate balance between faithful repair and misrepair at play within HDR domains  
11 and the critical roles of actin nucleators and repair proteins in achieving this balance.

12

## 13 **Methods**

### 14 **Cell culture and drug treatment**

15 Mouse embryonic fibroblast (MEF) and U2OS cell lines were cultured in high-glucose Dulbecco's modified  
16 Eagle's medium supplemented with L-glutamine, 10% fetal bovine serum, and 1% penicillin-streptomycin.  
17 ER-AsiSI MEF cell lines, including WT and BRCA1<sup>Δ11</sup> cells, were developed as previously described<sup>16</sup>. Cells  
18 were treated with doxycycline (Sigma-Aldrich: D3072, 3 μg/mL) for 24 hours to induce AsiSI expression.  
19 4-OHT (Sigma-Aldrich: H7904, 1 μg/mL) was added for the last 6 hours of doxycycline treatment to induce  
20 AsiSI translocation. Cells were co-treated with DMSO or 100 μM CK-666 (Sigma Aldrich: SML-006, 100 μM)  
21 and incubated at 37°C for 6 hours.

22 ER-AsiSI U2OS cells were obtained from Dr. Gaelle Legube<sup>13</sup>. For cell synchronization, cells were  
23 treated with 2 mM thymidine for two 18-h intervals separated by an 11-h release in fresh medium.  
24 Following double-thymidine block, cells were released into fresh medium for 7 h (G2) or 15 h (G1).  
25 Exponentially growing or synchronized cells were treated with 300 nM 4-OHT (Sigma Aldrich, H7904) to  
26 induce damage with DMSO or 100 μM CK-666. Cells were incubated at 37°C for 24 hours.

27

### 28 **Hi-C**

29 Chromosome conformation capture experiments were performed as previously described<sup>33</sup> with some  
30 modifications. Briefly, 5 million cells/library were crosslinked with 1% formaldehyde and lysed. After  
31 digesting chromatin with 400 units of DpnII overnight, DNA ends were labeled with biotinylated dATP  
32 using 50 units Klenow DNA polymerase. Blunt-end ligation was performed with 50 units T4 Ligase at 16°C

1 for 4 hours, followed by reverse crosslinking with 400  $\mu\text{g/ml}$  proteinase k at 65°C overnight. DNA was  
2 purified using phenol/chloroform extraction and ethanol precipitation, and concentrated on a 30 kDa  
3 Amicon Ultra column. Biotin was removed from unligated ends in 50 $\mu\text{l}$  reactions using 50 units T4 DNA  
4 polymerase/5 mg DNA. Following DNA sonication (Covaris S220) and Ampure XP size fractionation to  
5 generate DNA fragments of 100-300 bp, DNA ends were repaired using 7.5U T4 DNA polymerase, 25U T4  
6 polynucleotide kinase, and 2.5 U Klenow DNA polymerase. Libraries were enriched for ligation products  
7 by biotin pulldown with MyOne streptavidin C1 beads. To prepare for sequencing, A-tailing was  
8 performed using 15 units of Klenow DNA polymerase (3'-5' exo-) and Illumina TruSeq DNA LT kit Set A  
9 indexed adapters were ligated. Libraries were amplified in PCR reactions for 5-7 cycles and subjected to  
10 Ampure XP size selection prior to sequencing on an Illumina HiSeq 4000 machine using the Paired End 50  
11 bp module. Two biological replicates were performed for each condition.

12

### 13 **Hi-C Analysis**

14 Paired-end 50bp reads were processed using the distiller pipeline<sup>56</sup>. First, reads from MEF and U2OS  
15 libraries were mapped to mm10 and hg19 reference genomes, respectively, using BWA-MEM in single  
16 sided mode (-SP). Alignments were then parsed, classified, and filtered using pairtools<sup>56</sup>. The resulting  
17 valid pairs included uniquely mapped and rescued pairs with a minimum mapping quality of 30. Valid pairs  
18 were aggregated into binned contact matrices and kept as multi-resolution cooler files<sup>57</sup> for subsequent  
19 analyses. Where indicated, paired reads from replicate libraries were pooled prior to filtering for PCR  
20 duplicates. All Hi-C contact matrices were normalized by iterative correction<sup>19</sup>, excluding the first 2  
21 diagonals. Downstream analyses were performed using cooltools version 0.3.2<sup>58</sup> unless otherwise  
22 indicated, python 3.7.10, and matplotlib (Hunter, 2007). Hi-C interaction heatmaps were generated from  
23 balanced 250 kb resolution coolerfiles using cooler “show”. For heat maps, pooled and individual replicate  
24 library sets were downsampled to equal read depth.

25 The average contact probability ( $P(s)$ ) as a function of genomic distance was calculated using  
26 “compute-expected” from cooltools version 0.4.0<sup>59</sup>. The “diagsum” function was applied to balanced data  
27 binned at 1 kb to compute expected, which was then parsed into log-spaced bins of genomic distance  
28 using “logbin-expected”. The rate of contact frequency decay as genomic distance increases, the  $P(s)$   
29 derivative, was determined using “combine\_binned\_expected” and provides a highly informative  
30 representation of Hi-C data.

31 Active and inactive chromatin compartments were assessed based on eigenvector decomposition  
32 of observed/expected *cis* contact matrices binned at 250 kb resolution using the cooltools “call-

1 compartments” function. In this case, the first eigenvector, EV1, positively correlated with gene density  
2 and assignment of A or B compartment identity was based on high or low gene density, respectively.  
3 Saddle plots for *cis* interactions were generated using cooltools “compute-saddle”. For each library,  
4 ranked EV1 values were binned into 30 quantiles and observed/expected interactions were plotted.  
5 Saddle strength was quantified by comparing the average interaction frequency of each AA or BB quantile  
6 bin or bins to the analogous AB and BA bins (effectually (AB+BA)/2).

7 Average observed/expected Hi-C interaction frequencies at subsets of genomic loci were  
8 determined using the cooltools “snipping” function. To examine DSB clustering, all pairwise *cis*  
9 interactions between bin-aligned Top97-digested AsiS1 sites were aggregated at 25 kb resolution with a  
10 2 Mb flanking window. The DSB cluster enrichment score was calculated by taking the ratio of the average  
11 Hi-C interaction frequency in the 5x5 central bins (25 kb radius) and the average interaction frequency of  
12 the remaining bins (125 kb – 1 Mb radius). Loop extrusion was explored by examining aggregate Hi-C  
13 interactions at CTCF sites. CTCF positions were determined using a previously published CTCF ChIP-seq  
14 dataset from MEFs<sup>60</sup> (sample GSM2635593). Peaks were called using MACS3 ([https://github.com/macs3-](https://github.com/macs3-project/MACS)  
15 [project/MACS](https://github.com/macs3-project/MACS)) with the default “callpeak” parameters and candidate CTCF motifs, generated in HOMER<sup>61</sup>  
16 using a published vertebrate consensus<sup>62</sup> within 200 bp of these peaks were selected. For pileups, top  
17 CTCF sites (13927 total) were flipped based on the direction of the consensus motif and aggregated at 5  
18 kb bin resolution with a 100 kb flanking window. Loop aggregate plots were generated by considering all  
19 possible pairwise combinations of convergent CTCF sites on *cis* chromosomes with a genomic distance of  
20 20-1000 kb (64044 possible loops). Loop scores were calculated by taking the ratio of the average Hi-C  
21 interaction frequency in the 5x5 central bins (25 kb radius) and the average interaction frequency of the  
22 remaining bins (25-100 kb radius).

23

## 24 **High-throughput Genome-wide Translocation Sequencing**

25 HTGTS was performed as previously described<sup>32</sup>. Briefly, genomic DNA was collected using  
26 phenol/chloroform extraction, sonicated (Covaris S220), and amplified using biotin (MEF: 5’ Bio-  
27 TGGAGAGCGATGAACTGGATC 3’; U2OS: 5’-Bio-GCCGACCAATAGCATGGCG- 3’) and nested (MEF: 5’-  
28 NNNNNNBarcodeCGAAAACAGGATCCCGCAGC-3’; U2OS: 5’-BarcodeACTGCGGCTGCATCCAATC-3’) primers  
29 targeting chromosome 2 (MEFs, chr2: 13271321) and chromosome 9 (U2OS, chr9: 130693175). For the  
30 nested primer in MEF experiments, random nucleotides were added before the barcode to increase  
31 library diversity. Sequencing was performed on an Illumina MiSeq sequencer.

32

## 1 **High-throughput Genome-wide Translocation Analysis**

2 Burrows-Wheeler Aligner was used to align sequences to the mm10 (MEF) or hg19 (human) genomes.  
3 Using established pipelines ([https://github.com/robinmeyers/transloc\\_pipeline](https://github.com/robinmeyers/transloc_pipeline)), reads were filtered  
4 with the default parameters. All reads had good mapping quality (mapping quality >30). For translocation  
5 frequency, final reads were binned by 100 kb windows genome-wide. For each experiment, the number  
6 of reads in each window was normalized to the corresponding number of bait-only sequences obtained  
7 from the pipeline allowing us to compare translocation frequency between libraries. Genome  
8 coordinates of prey sequences were annotated using R package ChIPseeker<sup>63</sup>, which retrieved the  
9 location of each prey sequence (Promoter, Gene Body or Intergenic Region). Microhomology (MH)  
10 analysis was performed as previously described<sup>35</sup>. MH was defined as the overlapping homologous  
11 sequence between the bait and the prey site.

## 13 **Live-cell Imaging**

14 MEF cells were transfected with plasmids expressing NBS1-GFP using Neon Transfection System (1350 V,  
15 30 ms, 1 pulse). Cells were cultured on 35-mm glass bottom microwell dishes (MatTek) and damaged with  
16 0.5 µg/ml NCS (Sigma N9162) for 60 minutes at 37 °C. Following two washes with PBS, cells were allowed  
17 to recover for 10 hours before imaging. Imaging was performed on an A1RMP confocal microscope (Nikon  
18 Instruments), on a TiE Eclipse stand equipped with a 60×/1.49 Apo-TIRF oil-immersion objective lens, an  
19 automated XY stage, stage-mounted piezoelectric focus drive, and a heated, humidified stage top  
20 chamber with 5% CO<sub>2</sub> atmosphere. Z series were collected at 0.4-µm intervals throughout the entire  
21 nucleus every 5 min for 1 hour. Focus was maintained by the Perfect Focus System (Nikon). Mean-squared  
22 displacement analysis was performed as previously described<sup>2</sup>.

## 24 **Immunohistochemistry and quantification of γH2AX foci**

25 Fixed-cell imaging experiments were performed as previously described<sup>2</sup>. Briefly, U2OS cells were cultured  
26 on 8-well chamber slides and treated with 0.5 µg/ml NCS for 60 minutes at 37°C. Following two washes,  
27 cells were incubated at 37 °C to allow formation of γH2AX foci in the presence of DMSO or 100 µM CK-  
28 666. Cells were fixed with 4% PFA (pH 7.4) and permeabilized with 0.1% PBS-Triton X-100. Cells then were  
29 treated with primary antibody (γH2AX, EMD Millipore: 05-636, 1/500) at 4 °C overnight and secondary  
30 antibody (Alexa 488 conjugated goat anti-mouse Ig (Abcam: ab150113, 1/1,000)) for 1 hour at room  
31 temperature. Cells were imaged under 40x magnification using a Zeiss Axio Imager Z2 microscope,

1 equipped with a CoolCube1 camera (Carl Zeiss). Foci counting was performed using automated MetaCyte  
2 software (Metasystems, version 3.10.6).

3

#### 4 **Quantification of AsiSI-induced DSBs**

5 END-seq experiments and spike-in assays were performed as previously described<sup>16,64</sup>. AsiSI cutting  
6 efficiency at specific sites was measured by quantitative polymerase chain reaction (qPCR)<sup>17</sup> using delta-  
7 delta Ct to compare samples +/- 4OHT. Primers used in U2OS cells are as follows. Site 1: 5'-  
8 GTCCCTCGAAGGGAGCAC-3', 5'-CCGACTTTGCTGTGTGACC-3'; Site 2: 5'-CCGCCAGAAAGTTTCCTAGA-3', 5'-  
9 CTCACCCTGCAGCACTTG-3'. Primers used in MEF cells are as follows. Bait: 5'-  
10 TGGAGAGCGATGAACTGGATC-3', 5'-TGGCCGGATTTTGTGTGC-3'. Ct was normalized for DNA content using  
11 primers distant from any AsiSI motifs (No DSB). In U2OS cells: 5'-ATTGGGTATCTGCGTCTAGTGAGG-3', 5'-  
12 GACTCAATTACATCCCTGCAGCT-3'. In MEF cells: 5'-GGACAATGACCGCGTGTTTT-3', 5'-  
13 AACAGCAGGCGCTCTATACC-3'.

14

#### 15 **Gene Set Enrichment Analysis**

16 GSEAPreranked was used to assess the enrichment of the frequently cut AsiSI sites in transcriptionally  
17 active regions. The transcriptional profile of MEF cell line was downloaded from GEO  
18 <https://www.ncbi.nlm.nih.gov/geo/query/acc.cgi?acc=GSE29278><sup>65</sup> to create the preranked gene list with  
19 the level of gene expression as the input. The closest gene to each AsiSI site was collected to make the  
20 gene set \*.gmt file. The same approach was used to assess enrichment of prey sites (HTGTS) in  
21 transcriptionally active regions.

22

23 **Data Availability:** High throughput sequencing data have been deposited to Gene Expression Omnibus  
24 under accession number GSEXXXXXX.

25

26 **Acknowledgements:** We thank the Molecular Cytogenetics and Molecular Pathology Shared Resources of  
27 the Herbert Irving Comprehensive Cancer Center (HICCC) as well as T. Swayne and E.L. Munteanu from  
28 the Confocal and Specialized Microscopy Shared Resource of the HICCC at Columbia University. We also  
29 thank G. Legube for the ER-AsiSI U2OS cell lines; R. Baer for BRCA1<sup>Δ11</sup> MEFs used for live-cell imaging; and  
30 J. Min, G. Sidhu, and Y. Rose for comments on the manuscript. This work was supported by the following  
31 NIH/NCI/NHGRI grants: F30-CA250166 (J.Z.), CA197606 (J.G.), CA174653 (J.G., R.R., and Ju.Z), and

1 HG003143 (J.D.). The A.N. laboratory is supported by the Intramural Research Program of the NIH. J.D. is  
2 an investigator of the Howard Hughes Medical Institute.

3

4 **Author Contributions:** J.G. and J.Z. conceived of the study and wrote the manuscript. J.Z. conducted the  
5 majority of experiments. J.Z. A.S., and Ju.Z. performed data analysis. J.D., R.R., S.Z., and M.G. aided with  
6 data interpretation. A.S. and J.D. helped with implementation of Hi-C protocols. B.S. aided with initial  
7 experiments. E.C. and A.N performed END-seq experiments.

## Figure Legends

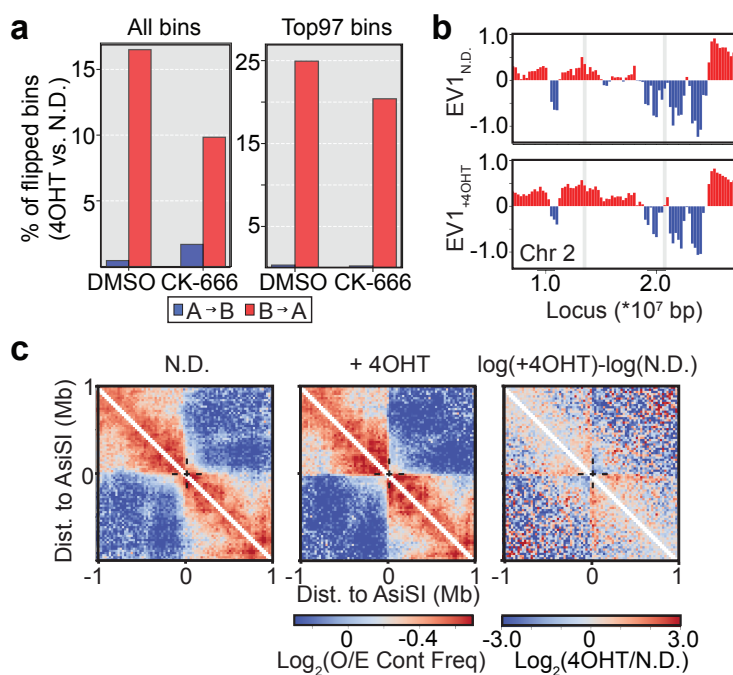

**Figure 1 | DNA damage induces multiscale alterations of the 3D genome. a**, Percent of A (open) or B (closed) compartment bins (250 kb) that flip identity genome-wide (left) upon induction of damage with 4OHT genome-wide and for the 2 Mb regions surrounding the top 97 frequently cut AsiSI sites in MEFs - (right). **b**, Representative trajectory of compartment flipping events. First eigenvector (EV1) tracks for *cis* interactions (250 kb bins) normalized to observed-expected. Values are phased by gene density (Active chromatin/A compartment>0, red). Frequently cut AsiSI sites are highlighted in grey. **c**, Average log<sub>2</sub>(observed/expected) Hi-C interaction frequency maps of the aggregated 2 Mb regions surrounding the most frequently cut AsiSI sites binned at 25 kb resolution.



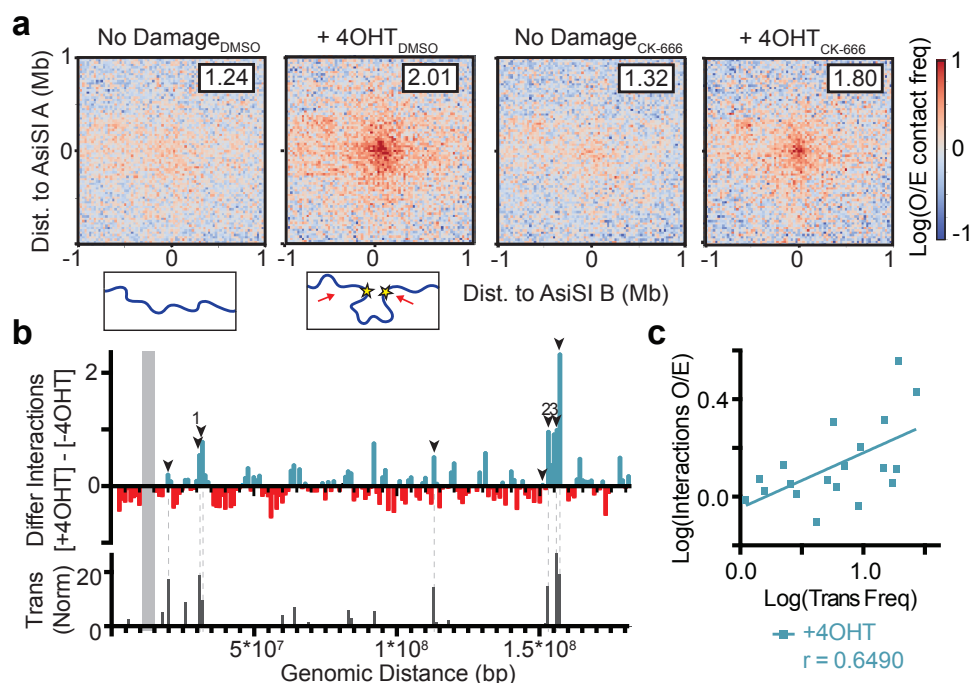

**Figure 2 | Translocations occur at sites of DSB clustering.** **a**, Top: Aggregate peak analysis (APA) displaying the contact frequencies of all possible pairwise combinations of the the top 97 AsiSI digested sites *in cis* (304 interactions between damaged bins). Data is binned at 25 kb and averaged for a 2 Mb flanking window.  $\text{Log}_2(\text{observed/expected})$  Hi-C maps are shown in the presence or absence of damage (4OHT) +/- CK-666. For each APA plot, a cluster enrichment score is calculated using the ratios of the average interaction frequency of the 9 central bins (125 kb) / average interaction frequency of the outside bins (125 kb – 1 Mb). Bottom: Schematic visualization of intra-chromosomal interactions and clustering following damage. **b**, Top: Differential interaction plots normalized to observed/expected between a 1 Mb region surrounding the bait site on chromosome 2 and the rest of chromosome 2, +/- 4OHT. Arrows represent frequently cut AsiSI sites. Data adjacent to the bait site along the main diagonal (grey box) has been omitted (11000000 to 16000000 Mb). Numbers (1-3) indicate three intrachromosomal sites analyzed in **Fig. 3b**. Bottom: Normalized translocation frequency (translocations per 1,000 events in the dataset) between bait and chromosome 2 loci following damage. **c**, Log-log correlation plot of translocation frequency versus Hi-C interaction frequency (+4OHT) for the 19 most common prey sites on chromosome 2. Pearson correlation (“ $r$ ”) is shown. Points within 1 Mb of the bait site have been excluded.

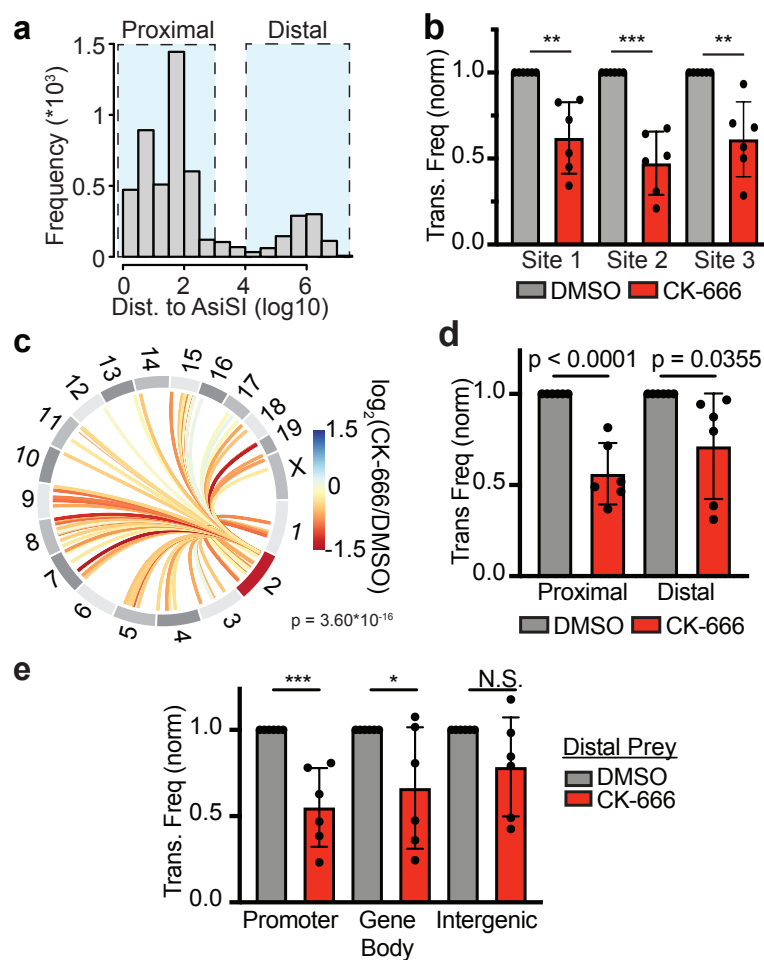

**Figure 3 | ARP2/3-mediated clustering facilitates chromosomal translocations.** **a**, Plot of all translocations as a function of their distance to the nearest AsiSI motif. Data is divided into proximal (<500 bp of an AsiSI site) and distal (>10 kb from an AsiSI site) prey **b**, Normalized translocation frequency at three sites on chromosome 2 (1 = 31,900,000–32,000,000 bp; 2 = 153,600,000–153,700,000 bp; 3 = 156,100,000–156,200,000 bp) in WT MEF AsiSI cells +/- 100  $\mu\text{M}$  CK-666. *P* calculated by Student's two-tailed t-test. Mean and standard deviation. **c**, Circos plot visualizing differential normalized translocation frequencies genome-wide following damage in the presence or absence of ARP2/3 inhibitor, CK-666 (100  $\mu\text{M}$ ) at binned loci that had  $\geq 10$  translocation events. Connecting lines are colored according to the  $\log_2$  fold change following damage between +/- CK-666 populations. Chromosome 2 (red) contains the bait site.  $P = 3.60 \times 10^{-16}$ , Wilcoxon test. **d**, Normalized translocation frequencies to proximal (<500 bp from AsiSI site) and distal (>10 kb from AsiSI site) loci in the presence and absence of 100  $\mu\text{M}$  CK-666. *P* calculated by Student's two-tailed t-test. Mean and standard deviation. **e**, Normalized translocation frequencies for distal prey in promoter, gene body, and intergenic regions in the presence or absence of CK-666. *P* calculated by Student's two-tailed t-test. Mean and standard deviation.

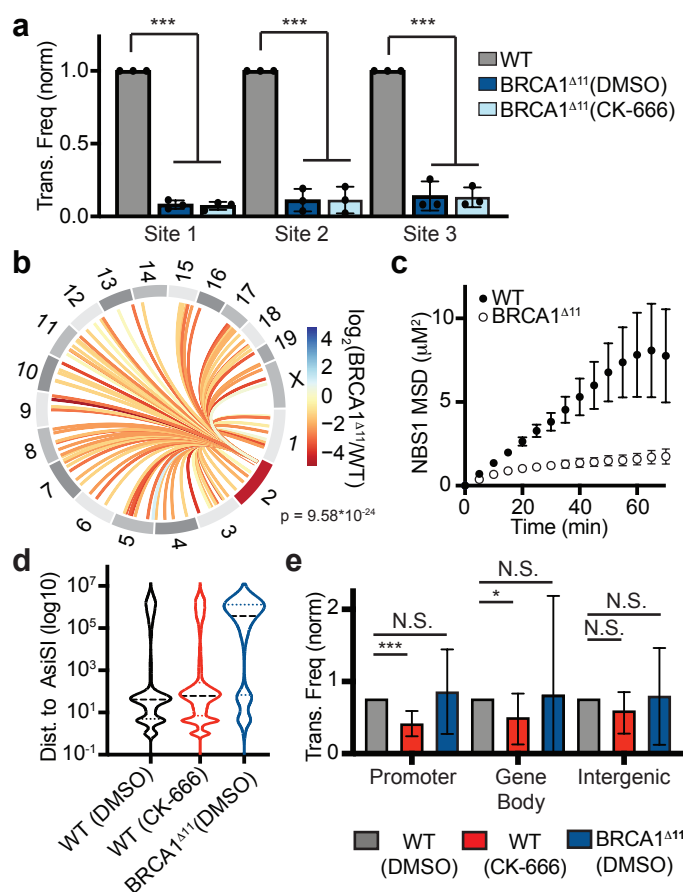

**Figure 4 | Distinct roles for BRCA1 in regulating translocations.** **a**, Normalized translocation frequencies at three binned sites on chromosome 2 (1 = 31,900,000–32,000,000 bp; 2 = 153,600,000–153,700,000 bp; 3 = 156,100,000–156,200,000 bp) in WT and BRCA1<sup>Δ11</sup> MEF AsiSI cells +/- 100 μM CK-666. Columns are normalized to frequency of translocations in WT cells in the same biological replicate. *P* calculated by one-way ANOVA Tukey's multiple comparisons. Mean and standard deviation. **b**, Circos plot showing differential normalized translocation frequencies following damage in BRCA1<sup>Δ11</sup> cells compared to WT. Connecting lines are colored according to the log<sub>2</sub> fold change between WT and BRCA1-deficient cell types following damage. Chromosome 2 (red) contains the bait site. *P* = 9.58\*10<sup>-24</sup>, Wilcoxon test. **c**, Mean-squared displacement of NBS1-GFP foci in WT and BRCA1<sup>Δ11</sup> cells treated with 0.5 μg/ml NCS. *n* > 195 foci in > 12 nuclei. **d**, Violin plot displaying the distribution of translocating prey as a function of the distance to the nearest AsiSI site in WT cells +/- CK-666 and BRCA1<sup>Δ11</sup> cells (dashed line = median, dotted lines = quartiles, *n* > 4 biological replicates). **e**, Normalized translocation frequencies for distal prey in promoter, gene body, and intergenic categories in WT cells (+/- CK-666) and BRCA1<sup>Δ11</sup> cells. *P* calculated with Student's two-tailed t-test. Mean and standard deviation.

## Extended Data Figure Legends

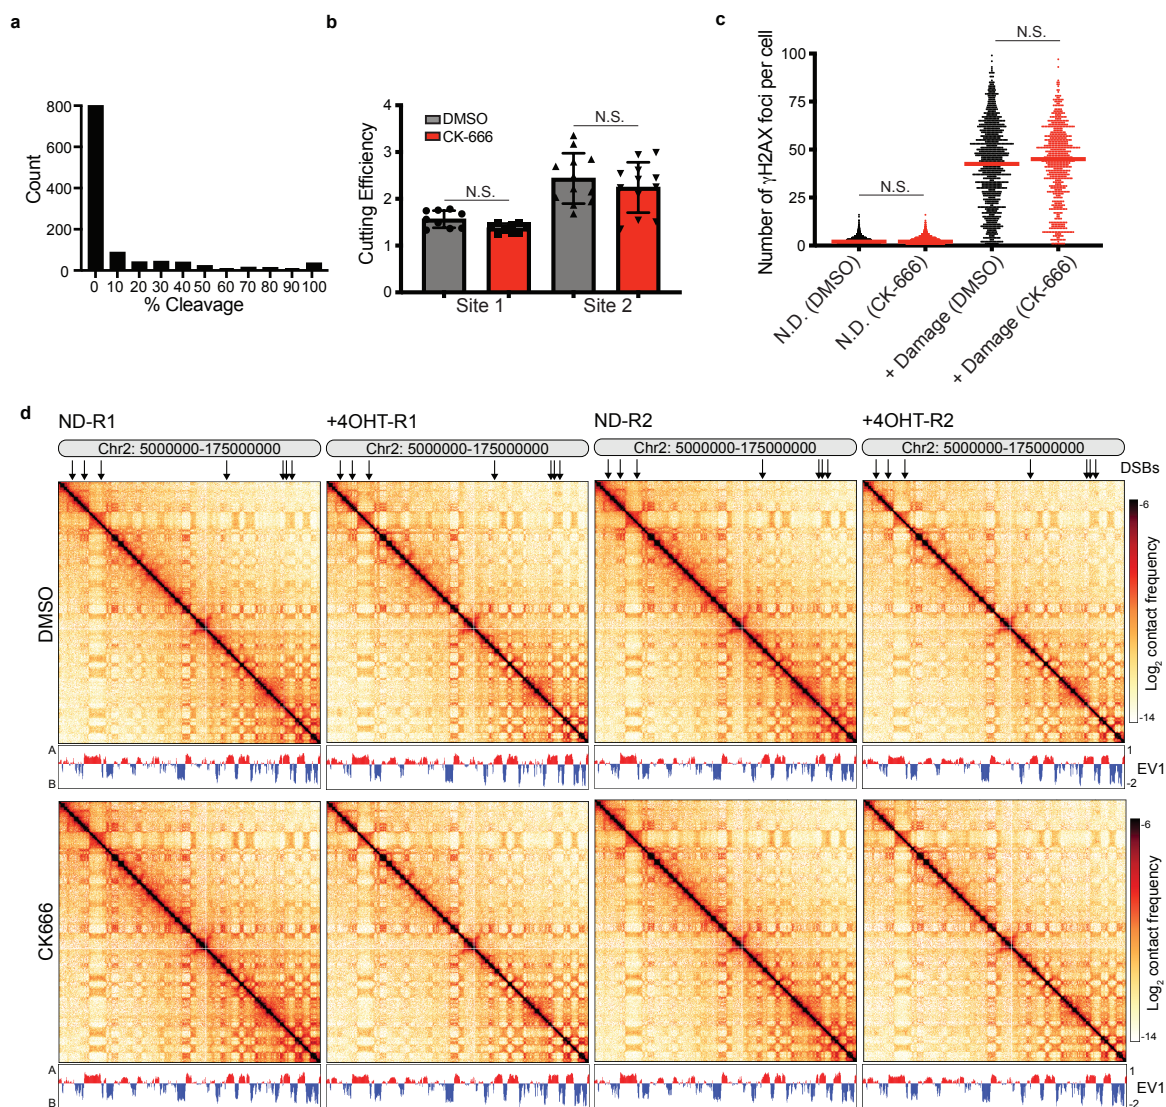

**Extended Data Figure 1 | Characterization of MEF and U2OS cell lines.** **a**, AsiSI restriction endonuclease cutting efficiency at all AsiSI motifs in MEFs as measured by END-seq spike-in assays. **b**, Cutting efficiency for two AsiSI sites (chr9: 130693175 and chr2: 38864106) in U2OS cells +/- 100  $\mu$ M CK-666. DNA was extracted from cells 4 hours following damage and % DSBs was measured using quantitative PCR amplification with primers close to the AsiSI sites, normalized to a control (uncleaved) site. Mean and standard deviation.  $n = 3$  biological replicates with each 3 technical replicates.  $P$  calculated by Student's two-tailed t-test. **c**, Quantification of  $\gamma$ H2AX foci/cell in undamaged U2OS cells, and cells treated with 0.5  $\mu$ g/ml NCS +/- CK-666. Cells were allowed to recover for two hours following damage.  $P$  calculated by two-sided Mann-Whitney test. Red line indicates mean. **d**, Hi-C interaction frequency maps for a region of chromosome 2 binned at 250 kb and accompanying first eigenvector tracks (EV1) for *cis* interactions phased

by gene density (Active/A compartment > 0). Top 97 frequently digested AsiSI sites in MEFs are indicated by arrows.

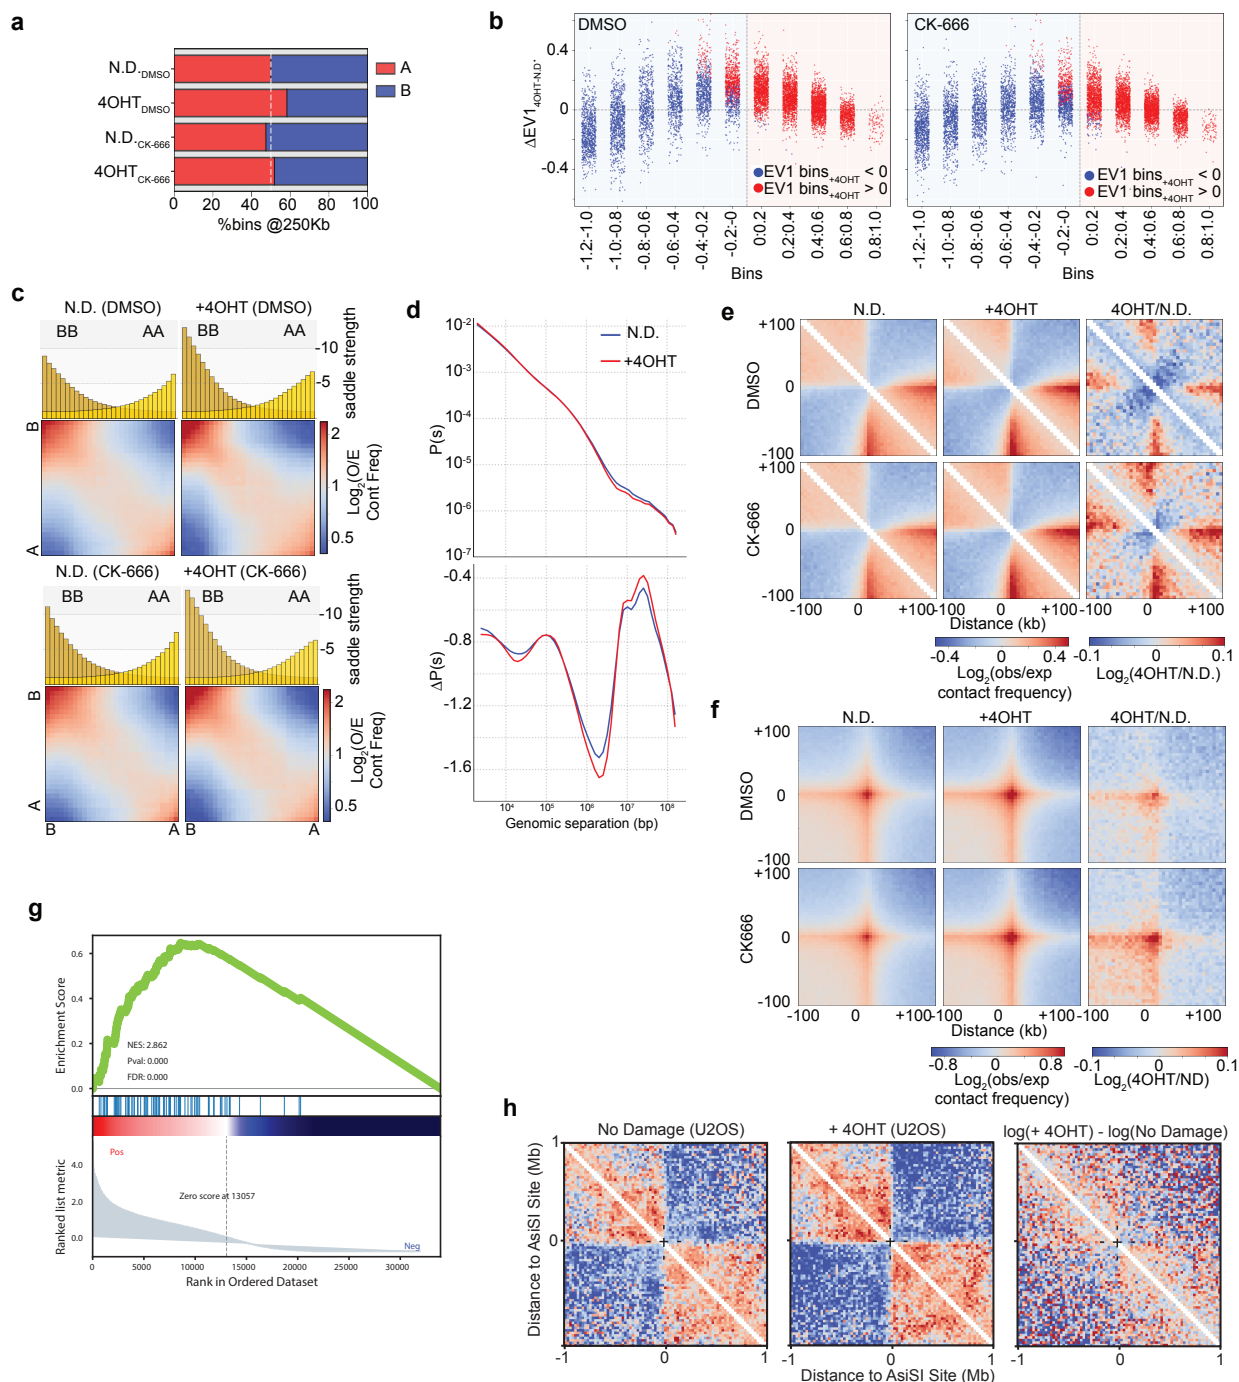

**Extended Data Figure 2 | Genome reorganization following damage.** **a**, Fraction of the genome (250 kb bins) classified as A (EV1>0) or B (EV1<0) compartment before and after damage +/- CK-666 (100  $\mu$ M). **b**, Genome wide changes in EV1 (+4OHT vs N.D. control) plotted as a function of binned eigenvalues in the undamaged control. **c**, Saddle plots representing chromatin compartmentalization, i.e. the strength of A-A (bottom right quadrant) and B-B (top left quadrant) compartment interactions versus interactions between compartments (250 kb-binned data). Data is normalized by the expected interaction frequency

based on genomic distance. Histograms along the X-axis show the distribution of saddle strength, as measured by  $(AA+BB)/(AB+BA)$ . **d**, Top: Contact probability  $P$  plotted as a function of genomic distance  $s$  ( $P(s)$ ) for chromosome 2 in the presence or absence of DNA damage (4OHT). Bottom: Derivative plots emphasize changes in distant gene-gene interactions. **e**, Average  $\log_2(\text{observed/expected})$  Hi-C interaction frequency maps in the 200 kb regions flanking top CTCF sites (4052) binned at 5 kb resolution. **f**,  $\log_2(\text{observed/expected})$  Hi-C maps centered on all possible pairwise combinations of the top CTCF sites (11532 interactions) binned at 5 kb and averaged for a 200 kb flanking window. Log ratio interaction maps for 4OHT vs control treatments are shown. **g**, Gene set enrichment analysis (GSEA) plot (score curves) assessing the enrichment of the frequently cut AsiSI sites in transcriptionally active regions **h**, Pile-up heat maps 1 Mb surrounding the most frequently cut AsiSI sites in U2OS cells. For these experiments, no damage samples were exponentially growing, and damaged cells were synchronized in G2. Cells synchronized in G1 looked similar (data not shown).

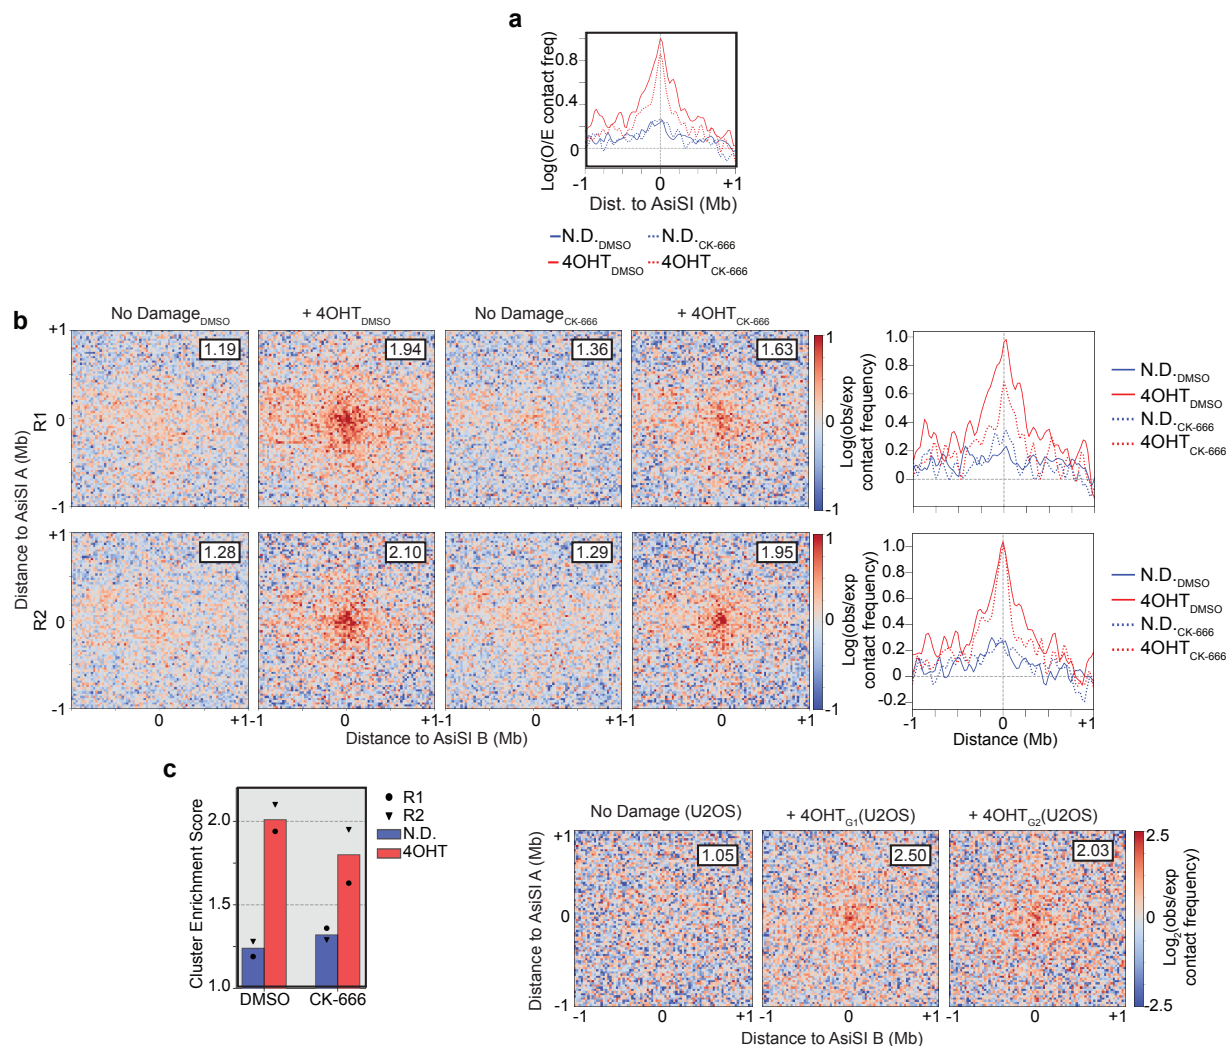

**Extended Data Figure 3 | DSB clustering in mouse and human cell lines.** **a**, Observed-expected contact frequencies derived from aggregate peak analysis (APA) in the presence and absence of damage +/- 100  $\mu$ M CK-666 (MEF cells). **b**, Left: Average Hi-C interactions centered on all possible combinations for the Top97 AsiSI digested sites *in cis* (304 interactions between damaged bins) for individual biological replicates. Data is binned at 25 kb and averaged for a 2 Mb flanking window. Log<sub>2</sub>(observed/expected) Hi-C maps are shown in the presence or absence of damage (4OHT) +/- CK-666. Top right corner in each aggregate peak analysis (APA) plot displays cluster enrichment score which is calculated using the ratios of the average interaction frequency of the 9 central bins (125 kb) / average interaction frequency of the outside bins (125 kb – 1 Mb). Right: Observed-expected contact frequency derived from aggregate peak analysis (APA) in the presence and absence of damage +/- 100  $\mu$ M CK-666 (MEF cells) for individual biological replicates. **c**, Quantification of cluster enrichment score for two biological replicates and pooled



data. **d**, APA plots (2 Mb flanking window, 25 kb resolution) of interactions between the most frequently cut U2OS AsiSI sites in *cis* (155 pairs). No damage cells were exponential growing, and damaged (+4OHT) cells were synchronized in G2. Cells synchronized in G1 looked similar (data not shown).

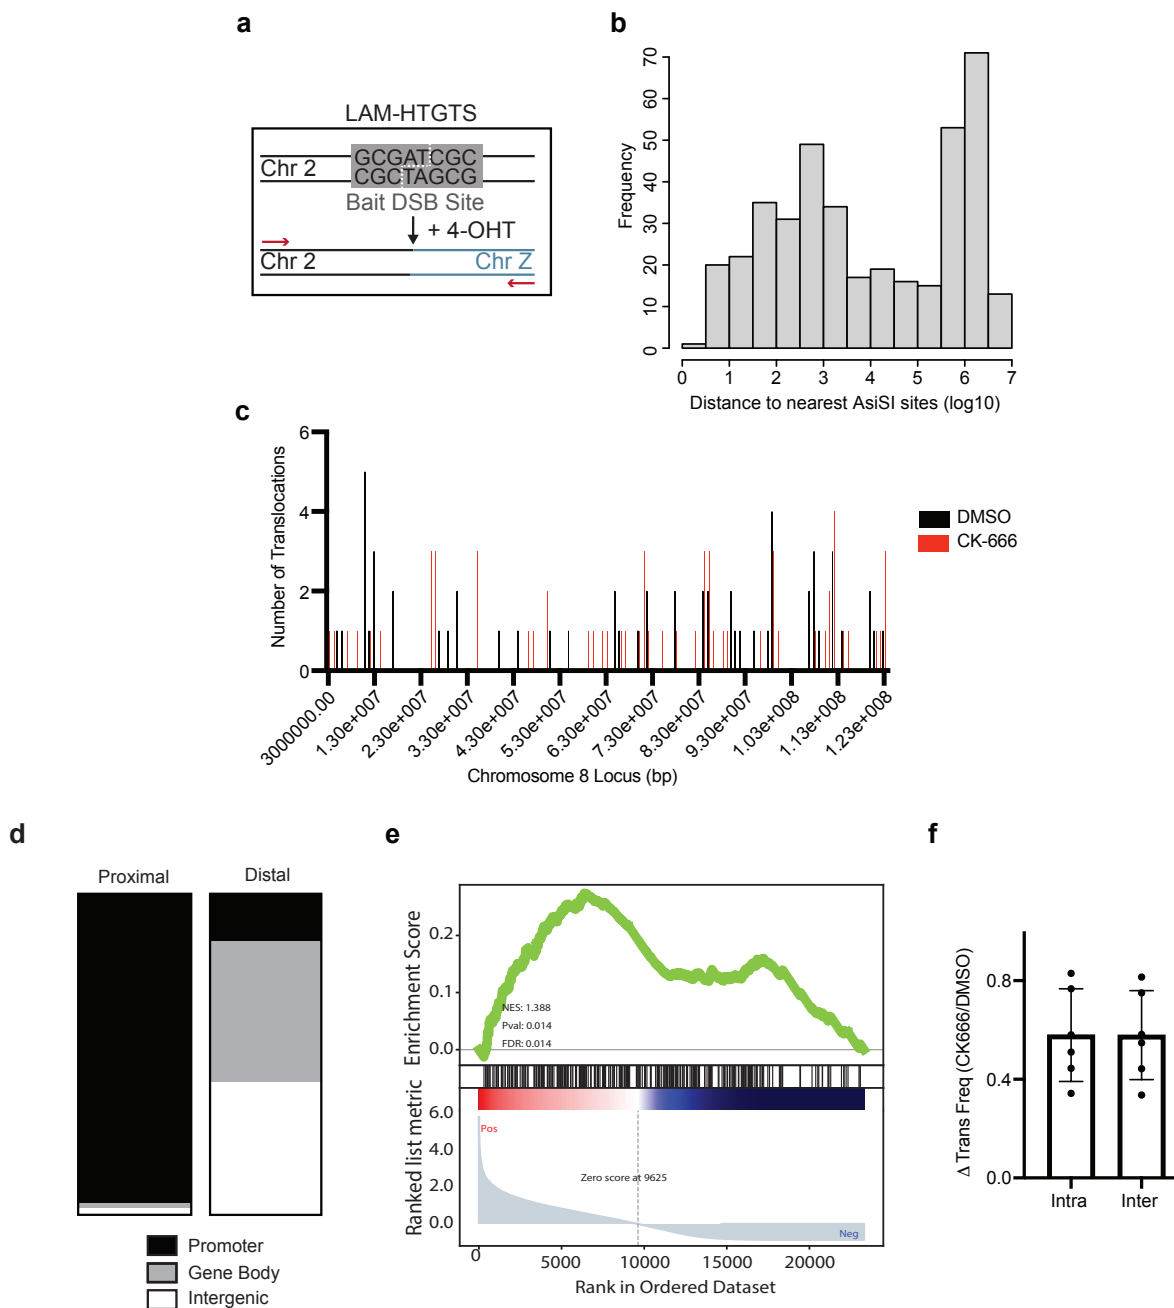

**Extended Data Figure 4 | Recurrent (proximal) versus spontaneous (distal) translocations** **a**, Schematic of HTGTS experiment. The bait site is located on chromosome 2, 13271321 bp. **b**, Distance of translocating loci (prey) to the nearest AsiSI motif in U2OS cells. **b**, Distribution of distal prey along chromosome 8 in two individual libraries (+/- CK-666). **c**, Distribution of proximal and distal prey into promoter, gene body, and intergenic categories. **d**, Gene set enrichment analysis (GSEA) plot (score curves) assessing enrichment of translocating prey in transcriptionally active areas. **e**, Fold change in normalized translocation frequency for intra- and inter-chromosomal events. Mean and standard deviation.

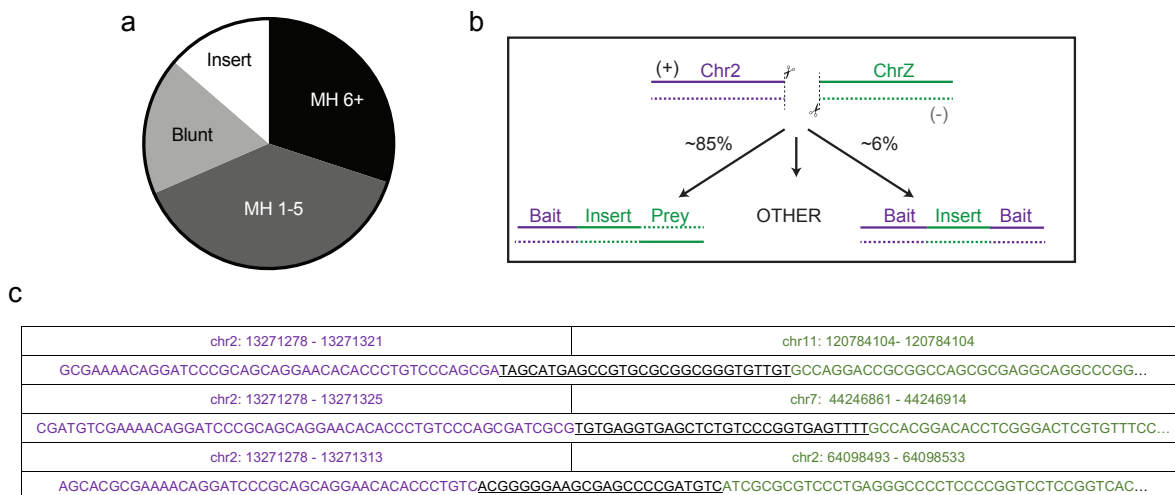

**Extended Data Figure 5 | Junctional analysis of translocation events.** **a**, Distribution of HTGTS prey by junctional type (MH, microhomology; blunt end ligation; insertion). **b**, Schematic representation of insertion events. **c**, Example reads that contain an insertion event (underline) in between bait (purple) and prey (green).

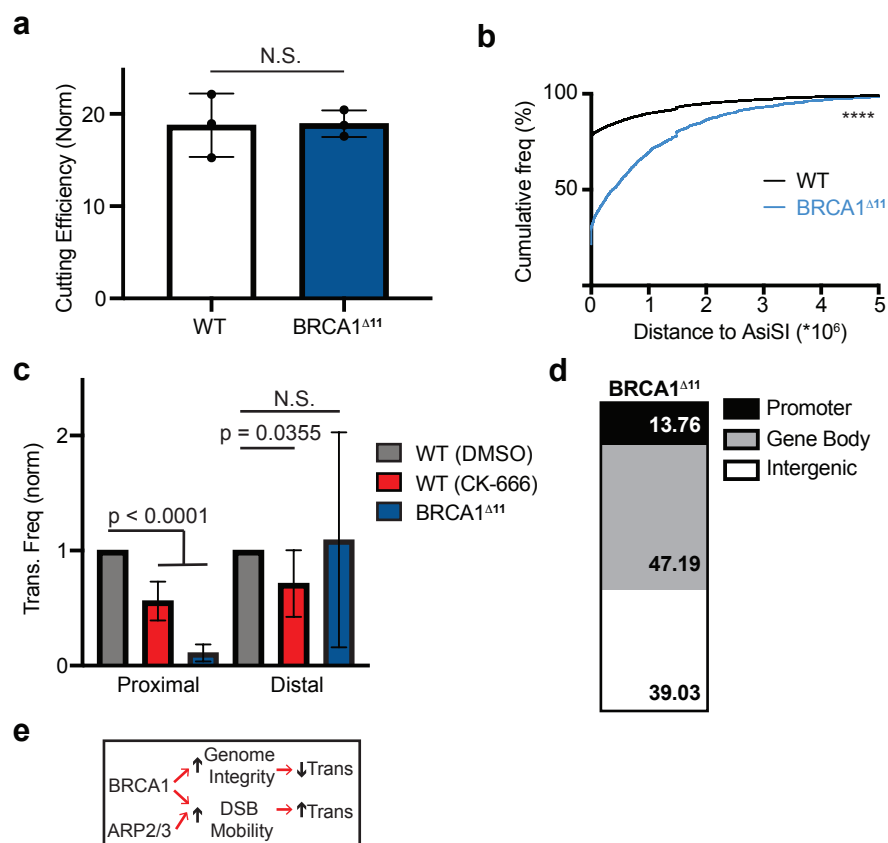

**Extended Data Figure 6 | BRCA1 facilitates translocations to recurrent DSBs.** **a**, Cleavage efficiency of the bait site in WT and BRCA1<sup>Δ11</sup> MEF AsiSI cells. DNA was extracted from cells 6 hours following damage and % DSBs was measured using quantitative PCR amplification with primers close to the bait and normalized to a control (uncleaved) site. Mean and standard deviation. n = 3 technical replicates. Biological replicates showed comparable results. *P* calculated by Student's two-tailed t-test. **b**, Cumulative translocation frequency as a function of distance to the nearest AsiSI site in WT and BRCA1<sup>Δ11</sup> MEF AsiSI cells. *P* calculated by Kolmogorov–Smirnov test. **c**, Normalized translocation frequency to proximal and distal prey in WT and BRCA1<sup>Δ11</sup> MEF AsiSI cells +/- 100 μM CK-666. Columns are normalized to frequency of translocations in WT cells in the same biological replicate. *P* calculated by one-way ANOVA Tukey's multiple comparisons. Mean and standard deviation. **d**, Distribution of prey into promoter, gene body, and intergenic categories for distal DSBs in BRCA1-deficient cells. **e**, Graphical representation of the distinct roles of BRCA1 in modulating translocations.

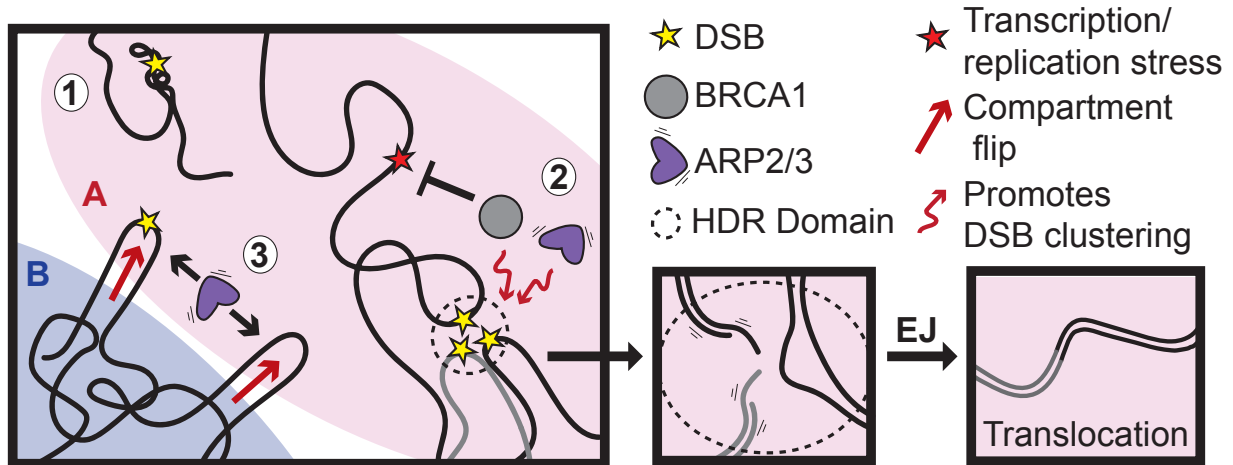

Extended Data Figure 7|Genome reorganization following DNA damage facilitates translocations.

Schematic representation of the multiscale changes in the 3D genome following damage.

## Works Cited

- 1 Schrank, B. & Gautier, J. Assembling nuclear domains: Lessons from DNA repair. *J Cell Biol* **218**, 2444-2455, doi:10.1083/jcb.201904202 (2019).
- 2 Schrank, B. R. *et al.* Nuclear ARP2/3 drives DNA break clustering for homology-directed repair. *Nature* **559**, 61-66, doi:10.1038/s41586-018-0237-5 (2018).
- 3 Symington, L. S. & Gautier, J. Double-strand break end resection and repair pathway choice. *Annu Rev Genet* **45**, 247-271, doi:10.1146/annurev-genet-110410-132435 (2011).
- 4 Caridi, C. P. *et al.* Nuclear F-actin and myosins drive relocalization of heterochromatic breaks. *Nature* **559**, 54-60, doi:10.1038/s41586-018-0242-8 (2018).
- 5 Lisby, M., Mortensen, U. H. & Rothstein, R. Colocalization of multiple DNA double-strand breaks at a single Rad52 repair centre. *Nat Cell Biol* **5**, 572-577, doi:10.1038/ncb997 (2003).
- 6 Aten, J. A. *et al.* Dynamics of DNA double-strand breaks revealed by clustering of damaged chromosome domains. *Science* **303**, 92-95, doi:10.1126/science.1088845 (2004).
- 7 Neumaier, T. *et al.* Evidence for formation of DNA repair centers and dose-response nonlinearity in human cells. *Proc Natl Acad Sci U S A* **109**, 443-448, doi:10.1073/pnas.1117849108 (2012).
- 8 Caron, P. *et al.* Non-redundant Functions of ATM and DNA-PKcs in Response to DNA Double-Strand Breaks. *Cell Rep* **13**, 1598-1609, doi:10.1016/j.celrep.2015.10.024 (2015).
- 9 Roukos, V. *et al.* Spatial dynamics of chromosome translocations in living cells. *Science* **341**, 660-664, doi:10.1126/science.1237150 (2013).
- 10 Sunder, S. & Wilson, T. E. Frequency of DNA end joining in trans is not determined by the predamage spatial proximity of double-strand breaks in yeast. *Proc Natl Acad Sci U S A*, doi:10.1073/pnas.1818595116 (2019).
- 11 Zhang, Y. & Jasin, M. An essential role for CtIP in chromosomal translocation formation through an alternative end-joining pathway. *Nat Struct Mol Biol* **18**, 80-84, doi:10.1038/nsmb.1940 (2011).
- 12 Rogakou, E. P., Boon, C., Redon, C. & Bonner, W. M. Megabase chromatin domains involved in DNA double-strand breaks in vivo. *J Cell Biol* **146**, 905-916, doi:10.1083/jcb.146.5.905 (1999).
- 13 Iacovoni, J. S. *et al.* High-resolution profiling of gammaH2AX around DNA double strand breaks in the mammalian genome. *EMBO J* **29**, 1446-1457, doi:10.1038/emboj.2010.38 (2010).
- 14 Clouaire, T. *et al.* Comprehensive Mapping of Histone Modifications at DNA Double-Strand Breaks Deciphers Repair Pathway Chromatin Signatures. *Mol Cell* **72**, 250-262 e256, doi:10.1016/j.molcel.2018.08.020 (2018).
- 15 Aymard, F. *et al.* Genome-wide mapping of long-range contacts unveils clustering of DNA double-strand breaks at damaged active genes. *Nat Struct Mol Biol* **24**, 353-361, doi:10.1038/nsmb.3387 (2017).
- 16 Callen, E. *et al.* 53BP1 Enforces Distinct Pre- and Post-resection Blocks on Homologous Recombination. *Mol Cell* **77**, 26-38 e27, doi:10.1016/j.molcel.2019.09.024 (2020).
- 17 Aymard, F. *et al.* Transcriptionally active chromatin recruits homologous recombination at DNA double-strand breaks. *Nat Struct Mol Biol* **21**, 366-374, doi:10.1038/nsmb.2796 (2014).
- 18 Lieberman-Aiden, E. *et al.* Comprehensive mapping of long-range interactions reveals folding principles of the human genome. *Science* **326**, 289-293, doi:10.1126/science.1181369 (2009).
- 19 Imakaev, M. *et al.* Iterative correction of Hi-C data reveals hallmarks of chromosome organization. *Nat Methods* **9**, 999-1003, doi:10.1038/nmeth.2148 (2012).
- 20 Oudelaar, A. M. & Higgs, D. R. The relationship between genome structure and function. *Nat Rev Genet* **22**, 154-168, doi:10.1038/s41576-020-00303-x (2021).
- 21 Nora, E. P. *et al.* Targeted Degradation of CTCF Decouples Local Insulation of Chromosome Domains from Genomic Compartmentalization. *Cell* **169**, 930-944 e922, doi:10.1016/j.cell.2017.05.004 (2017).

- 22 Gassler, J. *et al.* A mechanism of cohesin-dependent loop extrusion organizes zygotic genome architecture. *EMBO J* **36**, 3600-3618, doi:10.15252/embj.201798083 (2017).
- 23 Kim, J. S., Krasieva, T. B., LaMorte, V., Taylor, A. M. & Yokomori, K. Specific recruitment of human cohesin to laser-induced DNA damage. *J Biol Chem* **277**, 45149-45153, doi:10.1074/jbc.M209123200 (2002).
- 24 Strom, L., Lindroos, H. B., Shirahige, K. & Sjogren, C. Postreplicative recruitment of cohesin to double-strand breaks is required for DNA repair. *Mol Cell* **16**, 1003-1015, doi:10.1016/j.molcel.2004.11.026 (2004).
- 25 Arnould, C. *et al.* Loop extrusion as a mechanism for formation of DNA damage repair foci. *Nature* **590**, 660-665, doi:10.1038/s41586-021-03193-z (2021).
- 26 Sanders, J. T. *et al.* Radiation-induced DNA damage and repair effects on 3D genome organization. *Nat Commun* **11**, 6178, doi:10.1038/s41467-020-20047-w (2020).
- 27 Lajoie, B. R., Dekker, J. & Kaplan, N. The Hitchhiker's guide to Hi-C analysis: practical guidelines. *Methods* **72**, 65-75, doi:10.1016/j.ymeth.2014.10.031 (2015).
- 28 Rao, S. S. *et al.* A 3D map of the human genome at kilobase resolution reveals principles of chromatin looping. *Cell* **159**, 1665-1680, doi:10.1016/j.cell.2014.11.021 (2014).
- 29 Klein, I. A. *et al.* Translocation-capture sequencing reveals the extent and nature of chromosomal rearrangements in B lymphocytes. *Cell* **147**, 95-106, doi:10.1016/j.cell.2011.07.048 (2011).
- 30 Bunting, S. F. & Nussenzweig, A. End-joining, translocations and cancer. *Nat Rev Cancer* **13**, 443-454, doi:10.1038/nrc3537 (2013).
- 31 Schwer, B. *et al.* Transcription-associated processes cause DNA double-strand breaks and translocations in neural stem/progenitor cells. *Proc Natl Acad Sci U S A* **113**, 2258-2263, doi:10.1073/pnas.1525564113 (2016).
- 32 Hu, J. *et al.* Detecting DNA double-stranded breaks in mammalian genomes by linear amplification-mediated high-throughput genome-wide translocation sequencing. *Nat Protoc* **11**, 853-871, doi:10.1038/nprot.2016.043 (2016).
- 33 Hamperl, S. & Cimprich, K. A. Conflict Resolution in the Genome: How Transcription and Replication Make It Work. *Cell* **167**, 1455-1467, doi:10.1016/j.cell.2016.09.053 (2016).
- 34 Chiarle, R. *et al.* Genome-wide translocation sequencing reveals mechanisms of chromosome breaks and rearrangements in B cells. *Cell* **147**, 107-119, doi:10.1016/j.cell.2011.07.049 (2011).
- 35 Crowe, J. L. *et al.* Kinase-dependent structural role of DNA-PKcs during immunoglobulin class switch recombination. *Proc Natl Acad Sci U S A* **115**, 8615-8620, doi:10.1073/pnas.1808490115 (2018).
- 36 Seol, J. H., Shim, E. Y. & Lee, S. E. Microhomology-mediated end joining: Good, bad and ugly. *Mutat Res* **809**, 81-87, doi:10.1016/j.mrfmmm.2017.07.002 (2018).
- 37 Smith, M. J., Bryant, E. E., Joseph, F. J. & Rothstein, R. DNA damage triggers increased mobility of chromosomes in G1-phase cells. *Mol Biol Cell* **30**, 2620-2625, doi:10.1091/mbc.E19-08-0469 (2019).
- 38 Lal, A. *et al.* Comprehensive genomic characterization of breast tumors with BRCA1 and BRCA2 mutations. *BMC Med Genomics* **12**, 84, doi:10.1186/s12920-019-0545-0 (2019).
- 39 Davies, H. *et al.* HRDetect is a predictor of BRCA1 and BRCA2 deficiency based on mutational signatures. *Nat Med* **23**, 517-525, doi:10.1038/nm.4292 (2017).
- 40 Zamborszky, J. *et al.* Loss of BRCA1 or BRCA2 markedly increases the rate of base substitution mutagenesis and has distinct effects on genomic deletions. *Oncogene* **36**, 5085-5086, doi:10.1038/onc.2017.213 (2017).
- 41 Bunting, S. F. *et al.* 53BP1 inhibits homologous recombination in Brca1-deficient cells by blocking resection of DNA breaks. *Cell* **141**, 243-254, doi:10.1016/j.cell.2010.03.012 (2010).

- 42 Tarsounas, M. & Sung, P. The antitumorigenic roles of BRCA1-BARD1 in DNA repair and replication. *Nat Rev Mol Cell Biol* **21**, 284-299, doi:10.1038/s41580-020-0218-z (2020).
- 43 Chen, C. C., Feng, W., Lim, P. X., Kass, E. M. & Jasin, M. Homology-Directed Repair and the Role of BRCA1, BRCA2, and Related Proteins in Genome Integrity and Cancer. *Annu Rev Cancer Biol* **2**, 313-336, doi:10.1146/annurev-cancerbio-030617-050502 (2018).
- 44 Sirbu, B. M. & Cortez, D. DNA damage response: three levels of DNA repair regulation. *Cold Spring Harb Perspect Biol* **5**, a012724, doi:10.1101/cshperspect.a012724 (2013).
- 45 Van, H. T. & Santos, M. A. Histone modifications and the DNA double-strand break response. *Cell Cycle* **17**, 2399-2410, doi:10.1080/15384101.2018.1542899 (2018).
- 46 Benedict, B. *et al.* WAPL-Dependent Repair of Damaged DNA Replication Forks Underlies Oncogene-Induced Loss of Sister Chromatid Cohesion. *Dev Cell* **52**, 683-698 e687, doi:10.1016/j.devcel.2020.01.024 (2020).
- 47 Zhang, X. *et al.* Fundamental roles of chromatin loop extrusion in antibody class switching. *Nature* **575**, 385-389, doi:10.1038/s41586-019-1723-0 (2019).
- 48 Dai, H. Q. *et al.* Loop extrusion mediates physiological Igh locus contraction for RAG scanning. *Nature* **590**, 338-343, doi:10.1038/s41586-020-03121-7 (2021).
- 49 Belin, B. J., Lee, T. & Mullins, R. D. DNA damage induces nuclear actin filament assembly by Formin-2 and Spire-(1/2) that promotes efficient DNA repair. [corrected]. *Elife* **4**, e07735, doi:10.7554/eLife.07735 (2015).
- 50 Lottersberger, F., Karssemeijer, R. A., Dimitrova, N. & de Lange, T. 53BP1 and the LINC Complex Promote Microtubule-Dependent DSB Mobility and DNA Repair. *Cell* **163**, 880-893, doi:10.1016/j.cell.2015.09.057 (2015).
- 51 Altmeyer, M. *et al.* Liquid demixing of intrinsically disordered proteins is seeded by poly(ADP-ribose). *Nat Commun* **6**, 8088, doi:10.1038/ncomms9088 (2015).
- 52 Kilic, S. *et al.* Phase separation of 53BP1 determines liquid-like behavior of DNA repair compartments. *EMBO J* **38**, e101379, doi:10.15252/embj.2018101379 (2019).
- 53 Gostissa, M., Alt, F. W. & Chiarle, R. Mechanisms that promote and suppress chromosomal translocations in lymphocytes. *Annu Rev Immunol* **29**, 319-350, doi:10.1146/annurev-immunol-031210-101329 (2011).
- 54 Piazza, A., Wright, W. D. & Heyer, W. D. Multi-invasions Are Recombination Byproducts that Induce Chromosomal Rearrangements. *Cell* **170**, 760-773 e715, doi:10.1016/j.cell.2017.06.052 (2017).
- 55 Weinstock, D. M., Brunet, E. & Jasin, M. Induction of chromosomal translocations in mouse and human cells using site-specific endonucleases. *J Natl Cancer Inst Monogr*, 20-24, doi:10.1093/jncimonographs/lgn009 (2008).
- 56 Goloborodko, A., Abdennur, N., Venev, S., hbrandao & gfudenberg. mirnylab/pairtools v0.3.0. doi:10.5281/zenodo.2649383. (2019).
- 57 Abdennur, N. & Mirny, L. A. Cooler: scalable storage for Hi-C data and other genomically labeled arrays. *Bioinformatics* **36**, 311-316, doi:10.1093/bioinformatics/btz540 (2020).
- 58 Venev, S. *et al.* mirnylab/cooltools: v0.3.2. doi:10.5281/zenodo.3787004 (2020).
- 59 Venev, S. *et al.* open2c/cooltools: v0.4.1. doi:10.5281/zenodo.5214125 (2021).
- 60 Canela, A. *et al.* Genome Organization Drives Chromosome Fragility. *Cell* **170**, 507-521 e518, doi:10.1016/j.cell.2017.06.034 (2017).
- 61 Heinz, S. *et al.* Simple combinations of lineage-determining transcription factors prime cis-regulatory elements required for macrophage and B cell identities. *Mol Cell* **38**, 576-589, doi:10.1016/j.molcel.2010.05.004 (2010).
- 62 Kim, T. H. *et al.* Analysis of the vertebrate insulator protein CTCF-binding sites in the human genome. *Cell* **128**, 1231-1245, doi:10.1016/j.cell.2006.12.048 (2007).



- 63 Yu, G., Wang, L. G. & He, Q. Y. ChIPseeker: an R/Bioconductor package for ChIP peak annotation, comparison and visualization. *Bioinformatics* **31**, 2382-2383, doi:10.1093/bioinformatics/btv145 (2015).
- 64 Wong, N., John, S., Nussenzweig, A. & Canela, A. END-seq: An Unbiased, High-Resolution, and Genome-Wide Approach to Map DNA Double-Strand Breaks and Resection in Human Cells. *Methods Mol Biol* **2153**, 9-31, doi:10.1007/978-1-0716-0644-5\_2 (2021).
- 65 Shen, Y. *et al.* A map of the cis-regulatory sequences in the mouse genome. *Nature* **488**, 116-120, doi:10.1038/nature11243 (2012).
